# Supplementary material for: Solvothermal synthesis and growth mechanism of ultrathin Sb2Te3 hexagonal nanoplates with thermoelectric transport properties
Source: Royal Society of Chemistry journal article supplement (doi:10.1039/c1ra00642h), 2011-12-19
Supplement: c1ra00642h.pdf [file c1ra00642h.pdf]

# Solvothermal synthesis and growth mechanism of ultrathin $\text{Sb}_2\text{Te}_3$ hexagonal nanoplates with thermoelectric transport properties†

Rencheng Jin, Gang Chen,\* Jian Pei, Haiming Xu, and Zu Shun Lv

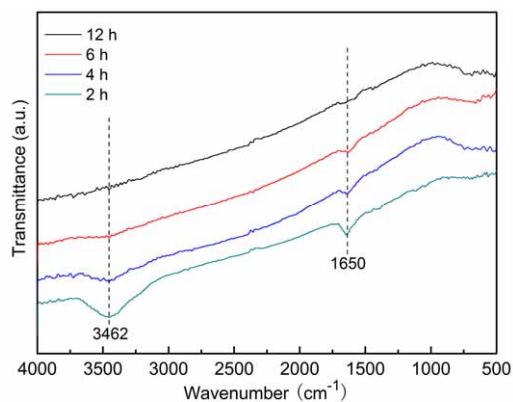

Fig. S1 FT-IR spectra of the products collected at different time intervals.

Table S1 The pH values of the solution with different volume ratio of ethanediamine and water.

| Ethanediamine/water | 2/28 | 5/25 | 10/20 | 15/15 | 20/10 | 25/5 |
|---------------------|------|------|-------|-------|-------|------|
| Before solvothermal | 10.8 | 11.7 | 12.1  | 12.6  | 13.2  | 13.7 |
| After solvothermal  | 11.6 | 11.9 | 12.4  | 12.7  | 13.4  | 13.9 |

Table S2 The density of the pellets with different sizes.

|            |      |      |      |
|------------|------|------|------|
| Size (nm)  | 500  | 60   | 40   |
| Density(%) | 86.4 | 84.9 | 84.6 |
